# Supplementary material for: Influence of basement heterogeneity on the architecture of low subsidence rate Paleozoic intracratonic basins (Reggane, Ahnet, Mouydir and Illizi basins, Hoggar Massif)
Source: Copernicus journal article supplement (doi:10.5194/se-9-1239-2018), 2018-11-07
Supplement: Supplementary file [file se-9-1239-2018-supplement-title-page.pdf › se-9-1239-2018-supplement-title-page.pdf]

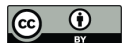

## *Supplement of*

# **Influence of basement heterogeneity on the architecture of low subsidence rate Paleozoic intracratonic basins (Reggane, Ahnet, Mouydir and Illizi basins, Hoggar Massif)**

**Paul Perron et al.**

*Correspondence to:* Paul Perron ([paul.perron@u-bourgogne.fr](mailto:paul.perron@u-bourgogne.fr), [paul.perron@hotmail.fr](mailto:paul.perron@hotmail.fr))

- [se-9-1239-2018-supplement-title-page.pdf](#)
- [Supplementary data 4 datation compilation.xls](#)

The copyright of individual parts of the supplement might differ from the CC BY 4.0 License.
